# Supplementary material
Source: Research Square preprint supplement (doi:10.21203/rs.3.rs-9768155/v1)
Supplement: Supplementary file 1 [file df39c25bcbaa751bf5ad39fa.docx]

**Supplementary data**

**Table S1** Texture parameters of sour meats during the fermentation.

| Time (d) | Group | Hardness (g) | Springiness | Cohesiveness (g.s) | Gumminess (g) | Chewiness (g) |
| --- | --- | --- | --- | --- | --- | --- |
| 0 | CK | 2847.27±0.71a | 0.72±0.001c | 0.61±0.001b | 1738.84±0.01a | 944.19±7.09a |
|  | L | 2898.56±0.70a | 0.49±0.001d | 0.57±0.010c | 1623.05±2.19a | 794.53±1.53b |
|  | F50 | 1544.16±75.81c | 0.88±0.070b | 0.55±0.020c | 846.84±68.32c | 684.32±34.15c |
|  | F75 | 1372.73±0.76d | 0.94±0.010ab | 0.60±0.001b | 827.10±0.04c | 777.96±0.55b |
|  | F100 | 1710.11±102.88b | 0.97±0.002a | 0.67±0.010a | 1152.73±84.05b | 1122.29±79.87a |
| 3 | CK | 2942.03±146.47a | 0.59±0.070c | 0.59±0.004ab | 1732.60±98.60a | 1012.69±61.55a |
|  | L | 2621.51±45.16a | 0.58±0.040c | 0.66±0.060a | 1735.01±123.90a | 870.50±63.05ab |
|  | F50 | 1613.98±168.03c | 0.81±0.090b | 0.61±0.050a | 988.62±180.56b | 791.28±53.68b |
|  | F75 | 1652.34±151.87c | 0.95±0.010a | 0.58±0.004ab | 956.79±95.48b | 907.13±78.98ab |
|  | F100 | 2153.15±181.66b | 0.83±0.004b | 0.52±0.001b | 1172.90±1.03b | 963.97±0.71a |
| 7 | CK | 3169.62±395.59a | 0.52±0.060a | 0.58±0.004a | 1827.83±215.13a | 1242.07±1.41a |
|  | L | 2394.01±149.11b | 0.58±0.230a | 0.61±0.130a | 1448.06±226.21b | 1012.99±145.17ab |
|  | F50 | 701.76±168.46c | 0.48±0.190a | 0.46±0.110a | 310.91±1.41c | 848.76±57.05b |
|  | F75 | 1041.08±0.28c | 0.55±0.001a | 0.49±0.001a | 512.37±0.13c | 878.93±0.61b |
|  | F100 | 1104.95±23.47c | 0.51±0.130a | 0.46±0.030a | 511.49±41.93c | 914.12±18.73b |
| 14 | CK | 4948.30±253.08a | 0.64±0.120b | 0.71±0.010a | 3499.48±221.67a | 1654.56±272.58a |
|  | L | 3444.78±263.03b | 0.55±0.210b | 0.66±0.140ab | 1930.14±151.76b | 1178.79±201.95bc |
|  | F50 | 1905.00±98.30c | 0.98±0.010a | 0.79±0.050a | 1493.82±15.34c | 952.24±32.52d |
|  | F75 | 1943.03±0.71c | 0.99±0.000a | 0.52±0.010b | 1029.72±0.71c | 1012.87±1.42cd |
|  | F100 | 2309.38±0.68c | 0.97±0.020a | 0.63±0.010ab | 1469.25±0.69c | 1440.97±0.78b |
| 21 | CK | 5074.26±49.83a | 0.70±0.060a | 0.67±0.060a | 3377.49±284.14a | 2371.98±10.84a |
|  | L | 4055.89±194.54b | 0.70±0.120a | 0.65±0.040a | 2653.62±295.45ab | 1913.68±112.15ab |
|  | F50 | 1792.32±104.68d | 0.79±0.040a | 0.62±0.002a | 1130.77±29.77c | 1069.04±7.94c |
|  | F75 | 2853.05±40.10c | 0.83±0.140a | 0.67±0.090a | 1902.68±239.89bc | 1099.49±100.14c |
|  | F100 | 3858.65±209.85b | 0.81±0.050a | 0.60±0.210a | 2239.12±216.46b | 1791.43±27.88ab |
| 28 | CK | 5958.22±514.90b | 0.63±0.010b | 0.56±0.030a | 3350.92±305.22b | 2108.11±210.97bc |
|  | L | 5010.31±139.24a | 0.62±0.003b | 0.68±0.010a | 4608.19±1.33a | 2866.31±1.55ab |
|  | F50 | 2389.02±2.44d | 0.98±0.010a | 0.69±0.020a | 1605.00±0.01c | 1565.28±1.50c |
|  | F75 | 4847.65±324.78c | 0.97±0.010a | 0.70±0.090a | 2760.34±242.85b | 1293.37±21.22d |
|  | F100 | 4348.91±379.91c | 0.83±0.180ab | 0.64±0.110a | 2743.36±237.12b | 2101.49±84.63bc |
| *p* value | Group | <0.001 | <0.001 | 0.369 | <0.001 | <0.001 |
|  | Time | <0.001 | <0.001 | 0.001 | <0.001 | <0.001 |
|  | Group*Time | <0.001 | 0.020 | 0.066 | <0.001 | 0.001 |

Data are represented as mean ± standard deviation (SD), an SD of 0.00 thus represents a variation of < 0.005.

1. d Values in a column with different lowercase letters are significantly different among groups at every fermentation period (*p* < 0.05).

**Table S2** Color parameters of sour meats during the fermentation.

|  | Group | Fermentation time (d) | | | | | |
| --- | --- | --- | --- | --- | --- | --- | --- |
| 0 | 3 | 7 | 14 | 21 | 28 |
| *L** | CK | 51.20±1.97Bb | 55.54±0.13Ac | 56.10±1.75Aab | 58.41±1.87Ab | 56.87±1.80Ab | 55.94±1.79Ab |
|  | L | 58.34±2.06Ba | 60.29±0.91ABa | 55.96±0.99Cab | 61.97±1.64Aa | 62.58±0.18Aa | 59.13±0.82Ba |
|  | F50 | 46.46±1.65Dc | 57.23±1.60Bbc | 53.46±1.32Cb | 61.90±1.00Aa | 60.99±0.59Aa | 55.00±1.44BCb |
|  | F75 | 52.38±0.32Db | 61.66±2.88Aa | 56.86±1.66BCa | 57.57±1.03Bb | 57.75±2.39Bb | 53.89±0.87CDab |
|  | F100 | 50.32±1.24Eb | 59.32±0.72Aab | 58.30±1.45ABa | 57.25±1.14Bb | 55.42±0.59Cb | 52.68±0.61Dc |
| *a** | CK | 2.43±0.62Ca | 6.62±0.83Ba | 7.33±0.49Bc | 10.25±1.72Aa | 9.44±1.13Aa | 9.28±1.25Aa |
|  | L | 2.18±0.74Ba | 8.30±0.72Aa | 8.74±0.52Ab | 8.98±0.89Aa | 9.41±0.77Aa | 8.10±0.54Aa |
|  | F50 | 2.59±0.18Ca | 8.13±0.26Ba | 8.65±0.32Bb | 10.93±1.11Aa | 7.76±0.56Ba | 8.70±0.51Ba |
|  | F75 | 0.76±0.19Cb | 7.39±2.06ABa | 7.09±0.64Bc | 9.61±1.41Aa | 8.30±1.40ABa | 9.16±0.94ABa |
|  | F100 | 1.03±0.56Cb | 7.79±0.39Ba | 10.22±0.93Aa | 9.52±0.58ABa | 7.89±1.61Ba | 8.91±1.71ABa |
| *b** | CK | 15.96±0.12Aa | 7.08±0.37Cbc | 8.42±0.67Ba | 8.19±0.33Ba | 8.86±0.77Ba | 7.07±0.47Cb |
|  | L | 12.60±1.31Ab | 8.70±0.30Ba | 8.36±0.45Ba | 8.16±0.31Ba | 9.25±0.75Ba | 8.00±0.07Ba |
|  | F50 | 16.95±0.60Aa | 6.87±0.26CDc | 8.36±0.11Ba | 7.38±0.32Cbc | 7.18±0.57CDb | 6.57±0.25Db |
|  | F75 | 14.50±3.43Aab | 7.22±0.59Bbc | 7.75±1.90Ba | 7.97±0.33Bab | 6.66±1.03Bb | 6.76±0.63Bb |
|  | F100 | 14.30±0.49Aab | 7.68±0.34Cb | 8.47±0.54Ba | 7.26±0.44CDc | 6.63±0.38Db | 7.15±0.09CDb |

Values are represented as mean ± SD.

a-c Values in a column with different lowercase letters are significantly different (*p* < 0.05).

A−E Values in a row with different uppercase letters are significantly different (*p* < 0.05).

**Table S3** The volatile organic compounds (VOCs) contents of sour meats at 21 d.

| VOCs | Chemical formula | RI | Content (μg cyclohexanone equivalents/100 g sample) | | | | |
| --- | --- | --- | --- | --- | --- | --- | --- |
| CK-21 | L-21 | F50-21 | F75-21 | F100-21 |
| ***Alkane (5)*** |  |  |  |  |  |  |  |
| Undecane | C11H24 | 1100 | 22.99±6.12 | 14.25±1.11 | 7.88±1.96 | 5.32±0.85 | 9.26±2.60 |
| Dodecane | C12H26 | 1200 | ND | 19.37±2.76 | 24.62±4.42 | 15.69±4.64 | 29.46±11.13 |
| Tridecane | C13H28 | 1300 | ND | 16.84±1.43 | 16.63±4.94 | ND | ND |
| Tetradecane | C14H30 | 1400 | ND | 8.38±5.06 | 15.69±5.08 | 13.64±5.64 | 21.47±8.01 |
| Hexadecane | C16H34 | 1600 | ND | 2.29±0.28 | 3.90±1.33 | 4.83±1.59 | 3.98±1.49 |
| ***Aldehydes (14)*** |  |  |  |  |  |  |  |
| Hexanal | C6H12O | 800 | 1228.19±11.87 | 741.67±34.95 | 230.55±8.73 | 180.15±6.36 | 366.32±6.02 |
| Heptanal | C7H14O | 901 | 145.19±1.63 | 63.01±9.60 | 37.57±1.56 | 33.44±0.09 | 48.41±6.09 |
| (Z)-2-Heptenal | C7H12O | 958 | 535.40±4.85 | 150.40±12.53 | 62.79±10.31 | 54.82±0.33 | 77.21±8.60 |
| Octanal | C8H16O | 1003 | 228.64±2.31 | 58.75±15.36 | 51.18±4.24 | 43.95±6.88 | 71.19±7.51 |
| 5-Ethylcyclopent-1-enecarbaldehyde | C8H12O | 1040 | 219.90±2.09 | ND | 52.59±34.60 | 40.43±16.34 | 93.62±19.18 |
| Benzeneacetaldehyde | C8H8O | 1045 | 95.96±1.09 | 34.21±0.31 | 54.41±6.99 | 59.45±6.68 | 105.8±11.54 |
| (E)-2-Octenal | C8H14O | 1060 | 222.86±2.06 | 85.94±12.75 | 65.28±8.24 | 54.3±10.86 | 109.16±16.62 |
| Nonanal | C9H18O | 1104 | 328.42±3.20 | 142.03±14.70 | 106.07±22.00 | 95.87±15.25 | 149.52±13.28 |
| (E)-2-Decenal | C10H18O | 1263 | 104.30±1.10 | 43.95±8.61 | 34.28±3.06 | 27.1±8.52 | 62.27±15.87 |
| (E,E)-2,4-Decadienal | C10H16O | 1317 | 107.55±1.26 | 83.99±5.65 | 13.90±2.76 | ND | 31.12±5.72 |
| 2-Undecenal | C11H20O | 1367 | 48.17±0.45 | 15.15±4.86 | 16.54±4.98 | 11.91±6.70 | 32.63±9.61 |
| (E,E)-2,4-Nonadienal | C9H14O | 1216 | 79.01±11.68 | 17.1±5.55 | 2.31±0.39 | ND | 23.55±6.06 |
| (E)-2-Hexenal | C6H10O | 854 | 3.26±0.58 | 0.44±0.16 | ND | ND | 10.97±1.99 |
| Hexadecanal | C16H32O | 1817 | 68.90±5.96 | 20.71±0.17 | 12.68±2.79 | 13.44±3.20 | 13.19±0.86 |
| ***Alcohols (5)*** |  |  |  |  |  |  |  |
| 1-Pentanol | C5H12O | 765 | 2.09±0.75 | 3.29±0.18 | 3.24±1.20 | 0.57±0.13 | 1.03±0.20 |
| 1-Hexanol | C6H14O | 868 | 2.33±0.26 | 1.46±0.07 | 2.48±1.33 | ND | ND |
| 1-Heptanol | C7H16O | 970 | 293.02±2.65 | 16.53±4.48 | 41.11±4.13 | ND | 23.45±3.23 |
| 1-Octen-3-ol | C8H16O | 980 | 12.05±0.40 | 199.52±18.35 | 156.75±11.17 | 110.06±17.15 | 113.94±10.80 |
| 1-Octanol | C8H18O | 1071 | 92.91±5.57 | 31.12±5.30 | 40.13±10.01 | 21.70±3.70 | 25.65±5.91 |
| ***Esters (5)*** |  |  |  |  |  |  |  |
| 2-Ethylhexyl acetate | C10H20O2 | 1108 | ND | 5.87±1.57 | 19.58±0.42 | ND | 7.06±1.59 |
| Ethyl octanoate | C10H20O2 | 1196 | 14.12±2.11 | ND | 137.24±1.25 | 134.14±12.80 | 15.44±1.87 |
| Ethyl 9-decenoate | C12H22O2 | 1387 | ND | ND | 15.93±0.65 | 26.88±1.64 | ND |
| Ethyl decanoate | C12H24O2 | 1396 | ND | ND | 206.97±1.91 | 21.45±2.36 | 7.14±0.26 |
| Ethyl laurate | C14H28O2 | 1595 | ND | ND | 11.89±0.15 | ND | ND |
| ***Ketone (1)*** |  |  |  |  |  |  |  |
| 1-Octen-3-one | C8H14O | 979 | 48.90±0.56 | 5.73±1.71 | ND | ND | 29.16±18.49 |
| ***Acids (2)*** |  |  |  |  |  |  |  |
| Octanoic acid | C8H16O2 | 1180 | 196.73±1.82 | 46.02±3.80 | 4.25±3.56 | 24.87±4.88 | 1.23±0.27 |
| 2-Ethylhexanoic acid | C8H16O2 | 1124 | ND | 34.96±5.07 | 28.77±2.19 | ND | 23.09±3.36 |
| ***Others (1)*** |  |  |  |  |  |  |  |
| 2-Pentylfuran | C9H14O | 993 | 239.76±2.66 | 146.63±21.28 | 105.22±15.10 | 87.52±15.07 | 82.15±7.62 |

Values are represented as mean ± SD. ND represents not detected.

RI represents retention indices.

**Table S4** Odor thresholds and Odor Activity Values of the key volatile compounds (OAV > 1) in

sour meats at 21 d.

| Volatile organic compounds | Odor threshold[1] (μg/100g) | OAV | | | | |
| --- | --- | --- | --- | --- | --- | --- |
| CK-21 | L-21 | F50-21 | F75-21 | F100-21 |
| Dodecane | 7.700 | -- | 2.51 | 3.19 | 2.03 | 3.82 |
| Hexanal | 2.500 | 491.27 | 296.66 | 92.22 | 72.06 | 146.52 |
| Heptanal | 0.009 | 16132.22 | 7001.11 | 4174.44 | 3715.55 | 5378.88 |
| (Z)-2-Heptenal | 0.560 | 956.07 | 268.57 | 112.12 | 97.89 | 137.87 |
| Octanal | 0.004 | 57160 | 14687.50 | 12795.00 | 10987.50 | 17797.50 |
| (E)-2-Octenal | 0.027 | 8254.07 | 3182.96 | 2417.77 | 2011.11 | 4042.96 |
| Nonanal | 0.026 | 12631.53 | 5462.69 | 4079.61 | 3687.30 | 5750.76 |
| (E)-2-Decenal | 0.027 | 3862.96 | 1627.77 | 1269.62 | 1003.70 | 2306.29 |
| (E,E)-2,4-Decadienal | 0.023 | 4676.08 | 3651.73 | 604.34 | -- | 1353.04 |
| 2-Undecenal | 0.440 | 109.47 | 34.43 | 37.59 | 27.06 | 74.15 |
| (E,E)-2,4-Nonadienal | 0.002 | 39505.00 | 8550.00 | 1155.00 | -- | 11775.00 |
| 1-Heptanol | 0.230 | 1274.00 | 71.86 | 178.73 | -- | 101.95 |
| 1-Octen-3-ol | 0.027 | 446.29 | 7389.62 | 5805.55 | 4076.29 | 4220 |
| 1-Octanol | 0.220 | 422.31 | 141.45 | 182.4 | 98.63 | 116.59 |
| 2-Ethylhexyl acetate | 7.000 | -- | 0.83 | 2.79 | -- | 1 |
| Ethyl octanoate | 0.400 | 35.30 | -- | 343.1 | 335.35 | 38.6 |
| 9-Ethyl-decenoate | 0.020 | -- | -- | 796.5 | 1344.00 | -- |
| Ethyl decanoate | 0.012 | -- | -- | 17247.5 | 1787.50 | 595 |
| 3-Octanone | 0.013 | 3761.53 | 440.76 | -- | -- | 2243.07 |
| Octanoic acid | 0.051 | 3857.45 | 902.35 | 83.33 | 487.64 | 24.11 |
| 2-Pentylfuran | 0.190 | 1261.89 | 771.73 | 553.78 | 460.63 | 432.36 |

Values are represented as means.

**Reference**

1. van Gemert, L. J., 2011. Compilations of odour threshold values in air, water and other media. 2nd ed. Zeist, The Netherlands: Oliemans Punter & Partners BV.
